# 1 **On the phenology of protists: Recurrent patterns reveal** 2 **seasonal variation of protistan (Rhizaria: Cercozoa,** 3 **Endomyxa) communities in tree canopies**

4 Susanne Walden<sup>1\*</sup>, Robin-Tobias Jauss<sup>2</sup>, Kai Feng<sup>1,3,4</sup>, Anna Maria Fiore-Donno<sup>1</sup>, Kenneth  
5 Dumack<sup>1</sup>, Stefan Schaffer<sup>2</sup>, Ronny Wolf<sup>2</sup>, Martin Schlegel<sup>2,5</sup>, Michael Bonkowski<sup>1</sup>

6 <sup>1</sup> University of Cologne, Institute of Zoology, Terrestrial Ecology, Cologne

7 <sup>2</sup> University of Leipzig, Institute of Biology, Biodiversity and Evolution, Leipzig

8 <sup>3</sup> CAS Key Laboratory for Environmental Biotechnology, Research Center for Eco-Environmental Sciences,  
9 Chinese Academy of Sciences, Beijing, China

10 <sup>4</sup> College of Resources and Environment, University of Chinese Academy of Sciences, Beijing, China

11 <sup>5</sup> German Centre for Integrative Biodiversity Research (iDiv) Halle Jena Leipzig, Leipzig

12

13 \*To whom correspondence should be addressed: Susanne Walden, University of Cologne, Institute of Zoology, Terrestrial Ecology,  
14 Zuelpicher Str. 47b, 50674 Cologne, Germany, telephone: +49-221-470-2927, fax: +49-221-470-5038, e-mail address: s.walden@uni-  
15 koeln.de

16

17 *Keywords: unicellular eukaryotes, metabarcoding, plant microbiome, microhabitats, forest ecosystems, plant pathogens*

## 18 **Abstract**

19 Tree canopies are colonized by billions of highly specialized microorganisms that are well adapted to  
20 the extreme microclimatic conditions, caused by diurnal fluctuations and seasonal changes. In this study  
21 we investigated seasonality patterns of protists in tree canopies of a temperate floodplain forest via high-  
22 throughput sequencing with group-specific primers for the phyla Cercozoa and Endomyxa. We observed  
23 consistent seasonality and identified divergent spring and autumn taxa. Tree crowns were characterized  
24 by a dominance of bacterivores and omnivores, while eukaryvores gained a distinctly larger share in  
25 litter and soil communities on the ground. Seasonality was largest among communities detected on the  
26 foliar surface. Higher variance within alpha diversity of foliar communities in spring indicated greater  
27 heterogeneity during community assembly. However, communities underwent distinct changes during  
28 the aging of leaves in autumn, reflecting recurring phenological changes during microbial colonization  
29 of leaves. Surprisingly, endomyxan root pathogens appeared to be exceptionally abundant across tree  
30 canopies during autumn season, demonstrating a potential role of the canopy surface as an important  
31 reservoir for wind-dispersed propagules. Overall, about 80% of detected OTUs could not be assigned to  
32 known species – representing only a fraction of dozens of microeukaryotic taxa whose canopy  
33 inhabitants are waiting to be discovered.

## 34 INTRODUCTION

35 Tree canopies – an ephemeral environment for microbes

36 The forest canopy is defined as ‘the aggregate of all tree crowns in a stand of vegetation, which is the  
37 combination of all foliage, twigs, fine branches, epiphytes as well as the air in a forest’ (Parker, Lowman  
38 and Nadkarni 1995). With an estimated area exceeding 100 million km<sup>2</sup> globally, the foliar surface forms  
39 the largest biological surface on earth (Morris and Kinkel 2002; Peñuelas and Terradas 2014).  
40 Nevertheless, knowledge on microorganisms inhabiting the phyllosphere, i.e. the whole aerial region of  
41 plants dominated by leaves (Vorholt 2012), is far less advanced than that of below-ground counterparts.  
42 The phyllosphere is subject to extreme microclimatic dynamics due to rapid changes in abiotic stressors  
43 such as UV radiation, temperature, humidity and osmotic pressure during daily fluctuations that only  
44 specially adapted microorganisms can cope with (Baldocchi and Collineau 1994; Vorholt 2012;  
45 Manching, Balint-Kurti and Stapleton 2014; Stone, Weingarten and Jackson 2018). Considering that  
46 perennial deciduous plants produce and shed their leaves every year, the phyllosphere represents a highly  
47 ephemeral environment (Vorholt 2012; Mwajita *et al.* 2013). Thus, it can be presumed that  
48 microorganisms dwelling within this habitat opportunistically colonize, multiply and occupy newly  
49 formed niches after leaf emergence throughout the year.

50 Seasonal variability – a major shaping agent of foliar bacterial communities

51 Former studies on foliar microecology observed bacteria to be by far the most abundant inhabitants,  
52 with on average 10<sup>6</sup>–10<sup>7</sup> bacterial cells per cm<sup>2</sup> of foliar surface (Lindow and Brandl 2003; Rastogi,  
53 Coaker and Leveau 2013). Investigations into the variation of microbial communities on leaves over  
54 multiple temporal and spatial scales provided detailed knowledge on the taxonomy and the ecology of  
55 bacterial leaf inhabitants (Thompson *et al.* 1993; Jacques, Kinkel and Morris 1995). Seasonal variability  
56 turned out to be a major driver of variation in these prokaryotic communities (Lauber *et al.* 2013).  
57 Another, but still neglected important factor shaping foliar bacterial communities are microbial  
58 predators, i.e. bacterivorous protists (Mueller and Mueller 1970; Bamforth 1973, 2007, 2010; Flues,  
59 Bass and Bonkowski 2017). Protistan predation has a profound influence on the structure and function  
60 of bacterial communities (Matz and Kjelleberg 2005; Krome *et al.* 2010; Jousset 2012; Amacker *et al.*

61 2020). Since these microbial eukaryotes comprise a vast array of functional traits in morphologies,  
62 locomotion and feeding modes (Fiore-Donno *et al.* 2019; Dumack *et al.* 2020), we presume that different  
63 protistan taxa play contrasting or complementary ecological roles within the heterogeneous habitat of  
64 forest canopy.

65 On the seasonal variability of protists

66 In contrast to molecular surveys on seasonal changes in prokaryote diversity (Rastogi *et al.* 2012;  
67 Copeland *et al.* 2015; Agler *et al.* 2016), studies on community shifts of protists over time were  
68 commonly conducted in aquatic systems for dominant taxa (Rynearson, Newton and Armbrust 2006;  
69 Aguilera *et al.* 2007) or at higher taxonomical level (Tamigneaux *et al.* 1997; Araújo and Godinho  
70 2008); studies on terrestrial protists often lack a temporal dimension. Consequently, analyses of  
71 seasonality in terrestrial protistan communities are a rarity and hitherto limited to a relatively small range  
72 of ecosystem types, dominated by soil habitats (Fiore-Donno *et al.* 2019; Fournier *et al.* 2020). Hence,  
73 the effect of a seasonal niche separation as a possible selective force which causes seasonal shifts of  
74 protistan communities dwelling on plant surfaces remains largely unexplored.

75 Protists and their distribution mechanisms

76 Dispersal of unicellular organisms in terrestrial environments is facilitated by dormant stages, i.e. resting  
77 cysts or spores (Foissner 1987, 2006; Verni and Rosati 2011). These can be carried over large distances  
78 by wind (Wilkinson 2001), rain and fog (Finlay 2002), or animals and humans (Revill, Stewart and  
79 Schlichting 1967; Schlichting and Sides 1969; Perrigo, Romeralo and Baldauf 2012). Recent studies on  
80 protists with taxon-specific primers allow for the first time a thorough recovery of the existing species  
81 richness in a habitat and indeed suggest a largely ubiquitous distribution within the same terrestrial  
82 ecosystem (Fiore-Donno *et al.* 2018, 2019; Degruene *et al.* 2019; Jauss *et al.* 2020a). Considering the  
83 large surface area that trees extend into the atmosphere, the forest canopy may act as huge reservoir for  
84 airborne microorganisms, thus may be conducive to their further spread into the surrounding soils (Jauss  
85 *et al.* 2020b). Accordingly, it may be suggested that community assembly is driven largely by random  
86 dispersal, but because the canopy is subject to extreme environmental conditions where only adapted  
87 species will successfully replicate and survive, we expect specific patterns of beta diversity to dominate

88 over random community assembly. Moreover, the question arises whether protistan communities  
89 undergo further seasonal changes, forced by changing abiotic conditions, or after the colonization of  
90 newly formed leaves and subsequent successions towards adapted species.

91 In this study, we investigated seasonal changes in protistan communities of different microhabitat  
92 compartments in the canopy region of three autochthonous tree species in a temperate floodplain forest.  
93 We further compared the canopy communities to those of the litter layer and mineral soil on the ground.  
94 Four samplings were conducted in two consecutive spring and autumn seasons, over a period of two  
95 years. We applied a MiSeq Illumina sequencing protocol using taxon-specific primers for the protistan  
96 phyla Cercozoa and Endomyxa (Rhizaria) (Fiore-Donno, Richter-Heitmann and Bonkowski 2020).  
97 Cercozoa are a highly diverse group representing many taxa and encompassing a variety of functional  
98 traits, and Endomyxa are of particular interest for comprising diverse plant parasites of economic  
99 importance (Neuhauser *et al.* 2014; Bass, Ward and Burki 2019, Dumack *et al.* 2020).

100 We hypothesized that **(I)** cercozoan and endomyxan communities differ in their seasonal composition  
101 in tree canopies. **(II)** Functional diversity of communities differs spatially and temporally between  
102 different microhabitats. **(III)** Despite the presumption that tree canopies act as a reservoir for wind-  
103 dispersed propagules, we expect specific patterns of beta diversity to dominate over randomness in  
104 community assembly throughout all samplings.

## 105 MATERIAL AND METHODS

### 106 Sampling, DNA extraction and sequencing

107 Microhabitat samples were collected during spring and autumn within a period of two years: October  
108 2017 and 2018, and May 2018 and 2019. The sampling took place in cooperation with the Leipzig  
109 Canopy Crane Facility in the floodplain forest in Leipzig, Germany (51.3657 N, 12.3094 E). All samples  
110 were obtained and processed as described in Jauss *et al.* (2020a). Briefly, seven different microhabitat  
111 compartments were sampled related to the canopy surface at 20-30m height: fresh leaves, deadwood,  
112 bark, arboreal soil and three cryptogamic epiphytes comprising lichen, and two moss species, *Hypnum*  
113 *sp.* and *Orthotrichum sp.* For comparison, two samples on the ground (leaf litter layer and mineral soil

114 underneath up to 10 cm depth) were sampled. All microhabitat samples were taken with four treatment  
115 replicates from three tree species (*Quercus robur*, *Tilia cordata* and *Fraxinus excelsior*) with three  
116 biological replicates each. DNA extraction was done according to the manufacturer's protocol with the  
117 DNeasy PowerSoil kit (QIAGEN, Hilden, Germany). DNA concentration and quality were checked  
118 using a NanoDrop Spectrophotometer (NanoDrop Technologies, Wilmington, USA). Semi-nested PCRs  
119 with tagged group-specific primers (Fiore-Donno, Richter-Heitmann and Bonkowski 2020) and  
120 Illumina sequencing were performed as described in Jauss et al. (2020a), the used primer and barcode  
121 combinations are provided in Supplementary Table S1 and S2.

## 122 Sequence processing

123 Sequence processing followed the pipeline described in Fiore-Donno, Richter-Heitmann and Bonkowski  
124 (2020). Briefly, paired reads were assembled using MOTHR v.39.5 (Schloss *et al.* 2009) allowing no  
125 differences in the primer and the barcode sequences and no ambiguities. Next, assembled sequences  
126 smaller than 300bp and with an overlap less than 200bp were removed. The obtained sequences were  
127 checked for their quality and clustered into Operational Taxonomic Units (OTUs) using VSEARCH  
128 (Rognes *et al.* 2016) with abundance-based greedy clustering (agc) and a similarity threshold of 97%.  
129 Clusters represented by  $\leq 0.005\%$  of the total number of reads were removed to reduce amplification  
130 errors and sequencing noise (Fiore-Donno *et al.* 2018). Sequences were assigned with the PR2 database  
131 (Guillou *et al.* 2013) using BLAST+ (Camacho *et al.* 2009) with an e-value of  $1e^{-50}$ , keeping only the  
132 best hit. Cercozoan and endomyxan sequences were aligned with a template provided in Fiore-Donno et  
133 al. (2018). Finally, to detect chimeric sequences UCHIME (Edgar *et al.* 2011) was used as implemented  
134 in MOTHR.

135 To explore the sequencing depth by sample metadata, the final OTU table was loaded into QIIME2  
136 v2018.11 (Bolyen *et al.* 2019). To ensure sufficient sequencing depths for further analyses a threshold  
137 for a minimum number of sequences per sample was determined, which was set as high as possible: at  
138 least five samples per microhabitat and 15 samples per tree species ( $\leq 7525$  reads sample<sup>-1</sup>).

## 139 Functional traits

140 We classified the protistan OTUs according to their respective feeding modes into bacterivores,  
141 eukaryvores and omnivores (i.e. feeding on both bacteria and eukaryotes) as in Dumack et al. (2020).  
142 The phytomyxean parasites, due to their peculiar life cycle, were considered separately in each  
143 functional category. We assigned traits at the genus level (Supplementary Table S3).

## 144 Statistical analyses

145 All statistical analyses were conducted in R v3.5.3 (R Core Team, 2019). Rarefaction curves were  
146 carried out with the iNEXT package (Hsieh, Ma and Chao 2015) to determine if a higher sequencing  
147 depth would have revealed more diversity. Alpha diversity indices were calculated for each microhabitat  
148 per sampling period using the *diversity* function in the vegan package (Oksanen *et al.* 2019). Analysis  
149 of season correlated OTU abundances was performed with the DESeq2 package (Love, Huber and  
150 Anders 2014) at the 1% significance level. To explore differences in community composition between  
151 the samples, the following beta diversity-based methods were conducted on relative abundances: Non-  
152 metric multidimensional scaling was performed on the Bray-Curtis dissimilarity matrix (functions  
153 *vegdist* and *metaMDS* in the vegan package); to show differences between fresh leaves communities of  
154 different sampling periods a principal coordinate analysis (PCoA, function *cmdscale* in the vegan  
155 package) was performed; to analyse the effects of environmental factors on the variance of the  
156 community composition, a redundancy analysis was carried out on the Hellinger-transformed table  
157 (function *rda* in the vegan package); to test if protistan OTUs and functional diversity differed across  
158 the sampled strata, microhabitats, tree species and seasons, a permutational multivariate analysis of  
159 variance (perMANOVA, function *adonis*) and, where appropriate, an analysis of variance (ANOVA,  
160 function *aov*) were conducted. The number of shared OTUs between different combinations of  
161 microhabitats was visualized using the UpSetR package (Lex *et al.* 2014; Gehlenborg 2019). Figures  
162 were plotted with the ggplot2 package (Wickham, 2016). Cercozoan and endomyxan diversity was  
163 illustrated using the Sankey diagram generator (<http://sankeymatic.com/>, 12 December 2020, date last  
164 accessed).

## 165 RESULTS

### 166 Sequencing results

167 We obtained 783 genuine cercozoan and endomyxan OTUs from 324 canopy and ground microhabitat  
168 samples representing on average 1.5 million filtered sequences per sampling period and 6 157 731 high  
169 quality sequence reads in total (Supplementary Table S4). However, 34 samples (ca. 10%) were removed  
170 because the yield was not sufficient ( $\leq 7525$  reads sample<sup>-1</sup>). The remaining 290 samples yielded on  
171 average 20 657 reads sample<sup>-1</sup> (min. 7633; max 57 404; SD 9520). The average number of OTUs was  
172  $780 \pm 1$ ,  $781 \pm 2$  and  $774 \pm 1$  per microhabitat, tree species and sampling period, respectively. In total  
173 22% of the OTUs showed a sequence similarity of 97-100% to any known reference sequence (Figure  
174 1 B). OTU001 occurred with exceptionally high read abundances in the canopy, being 18-fold higher  
175 than in the ground stratum (1 183 933 vs. 67 009 reads; ANOVA:  $F = 68.98$ ,  $p < 0.001$ , Figure 1A).  
176 Whereby, OTU001 had 86.14% sequence similarity to a molecularly undetermined glissomonadid  
177 species (Figure 1 A; Supplementary Table S5).

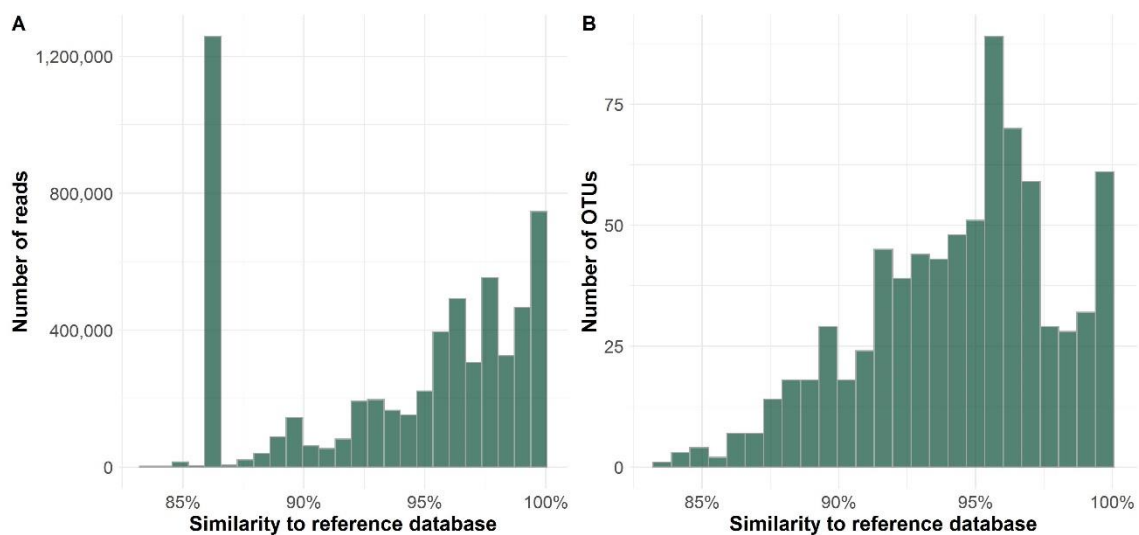

178 **Figure 1: Similarity of protistan reads and OTUs to the reference database.** Only 37% of all reads (A) and  
179 22% of all OTUs (B) were  $\geq 97\%$  similar to sequences within the respective database. Read numbers of OTU001  
180 (long bar in Figure 1A) exceed more than 1 million reads in tree canopies and was the most abundant OTU in  
181 every sampling period.

182 Sampling effort was sufficient for the majority of sampled microhabitats in both autumn samplings,  
183 where the total OTU richness was reached after only ca. 200 000 sequences. In spring samples, however,  
184 rarefaction curves for several microhabitats did not reach a plateau, especially for the samples of fresh



185 leaves (Supplementary Figure S1), suggesting that we underestimated the OTU richness in this habitat.  
186 A database with OTU abundances, taxonomic assignment and functional traits is provided  
187 (Supplementary Table S3).

## 188 Seasonal variation and spatial structuring

189 Investigation into seasonality patterns of OTUs revealed 81 OTUs with a higher frequency ( $p < 0.01$ ) in  
190 one of the two different seasons (Figure 2). These comprised 54 OTUs during autumn season, with 7%  
191 of OTUs belonging to the phylum Endomyxa and 93% cercozoan OTUs. In spring, 27 cercozoan OTUs  
192 were detected to be particularly abundant. Taxonomic assignment of these OTUs identified OTU394  
193 within the genus of *Rhogostoma* to be the most temporarily abundant OTU in autumn, followed by  
194 OTU627 assigned to the genus of *Thaumatomonas* and three endomyxan OTUs (OTU274, OTU230,  
195 OTU566) with >96% of their reads being found solely in autumn 2017 (Supplementary Figure S2,  
196 Supplementary Table S6). The endomyxan OTUs were root parasites (*Polymyxa betae*, OTU274;  
197 *Spongospora nasturtii*, OTU230) of the order Plasmodiophorida and a vampyrellid (OTU566), that were  
198 equally distributed across all canopy microhabitats and the ground in autumn. In spring, *Bodomorpha*  
199 sp. (OTU429), was temporarily highly abundant together with OTUs assigned to the genus  
200 *Thaumatomonas* (OTU472), two different *Euglypha* OTUs (OTU670, OTU675) and one  
201 *Paracercomonas* sp. (OTU735).

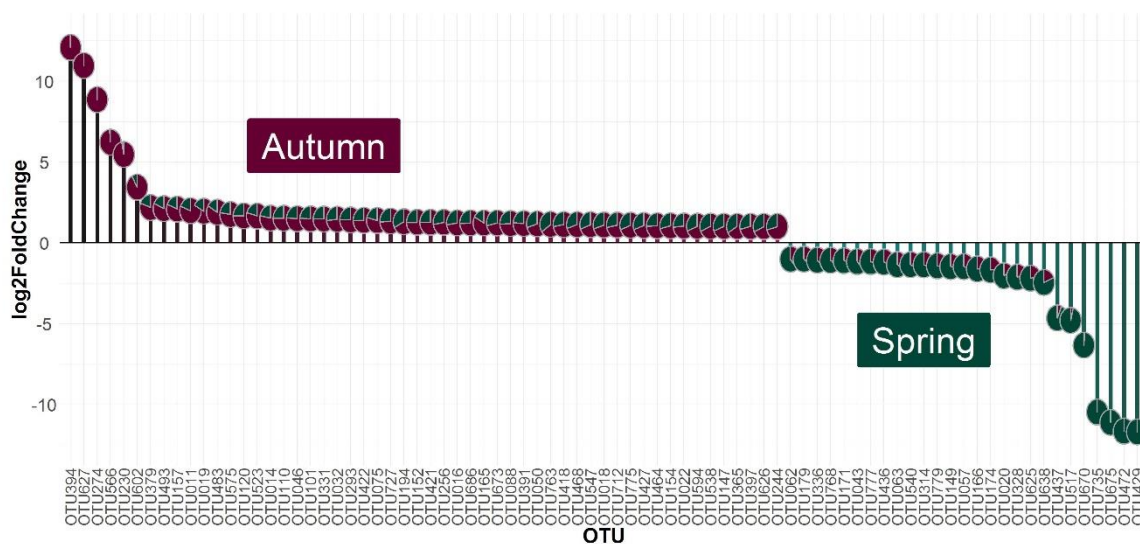

202 **Figure 2: Analysis of season correlated OTUs.** Investigation of autumn and spring communities revealed 54 and  
203 27 OTUs with predominance in autumn and spring samplings, respectively ( $p < 0.01$ ). Pie charts on the top of the  
204 bars represent the relative proportion of each OTU either in the autumn (purple) or spring (green) season.



205 Analysis of alpha diversity revealed similar patterns for every season (Supplementary Figure S3).  
206 However, OTU richness of fresh leaves showed much higher variation in spring as compared to autumn  
207 samples (ANOVA: F value = 5.98,  $p < 0.05$ ); otherwise the general pattern was quite stable with fresh  
208 leaves, deadwood, arboreal soil and lichen having lower OTU richness as compared to bark and mosses  
209 (*Orthotrichum* sp., *Hypnum* sp.). On the ground, leaf litter appeared to have lower OTU richness than  
210 soil habitat (ANOVA: F value = 29.48,  $p < 0.001$ ). In general, Simpson diversity, Shannon diversity, as  
211 well as species evenness showed almost the same pattern for both seasons (ANOVA; Simpson: F value  
212 = 3.55,  $p = 0.06$ ; Shannon: F value = 0.28,  $p = 0.60$ ; evenness: F value = 0.05,  $p = 0.82$ ).

213 Non-metric multidimensional scaling of cercozoan and endomyxan beta diversity showed a clear  
214 separation between communities detected in the ground (litter and soil) and the canopy, plus a seasonal  
215 variability of these two strata (Figure 3, Supplementary Table S7). Most variation in protistan beta  
216 diversity within all four sampling periods was explained by microhabitat differences (perMANOVA:  $R^2$   
217 0.22,  $p < 0.01$ ) and differences between canopy and ground (perMANOVA:  $R^2$  0.17,  $p < 0.01$ ). A very  
218 small, but significant proportion of beta diversity was explained by differences between the two seasons,  
219 spring and autumn (perMANOVA; canopy:  $R^2$  0.02,  $p < 0.01$ ; ground:  $R^2$  0.05,  $p < 0.05$ ). Tree species-  
220 specific differences between canopy communities were detected for *Quercus robur* (perMANOVA:  $R^2$   
221 0.04,  $p < 0.01$ ) and *Tilia cordata* (perMANOVA:  $R^2$  0.01,  $p < 0.01$ ), although communities of fresh  
222 leaves were not influenced by the tree species (perMANOVA:  $R^2$  0.11,  $p = 0.06$ ), nor were the  
223 communities of leaf litter on the ground (perMANOVA:  $R^2$  0.09  $p = 0.10$ ).

224 However, in autumn 2017 and spring 2018 cercozoan and endomyxan communities of leaf litter on the  
225 ground were more similar to the canopy communities than to the communities from the mineral soil  
226 directly underneath (Figure 3). Protistan communities detected on fresh leaves changed markedly  
227 between spring and autumn. In spring, communities detected on fresh leaves were still more similar to  
228 the other canopy microhabitats, but they became completely distinct in autumn (Supplementary Figure  
229 S4). Further, small seasonal differences in beta diversity for communities of bark and epiphytes with  
230 lichen and mosses (*Hypnum* sp. and *Orthotrichum* sp.) were detected (Supplementary Table S7).  
231 Communities of arboreal soil were highly variable in all four sampling periods, ranging from samples

232 with high similarity to communities of the sampled epiphytes to communities closely resembling those  
233 of the mineral soil underneath the litter layer.

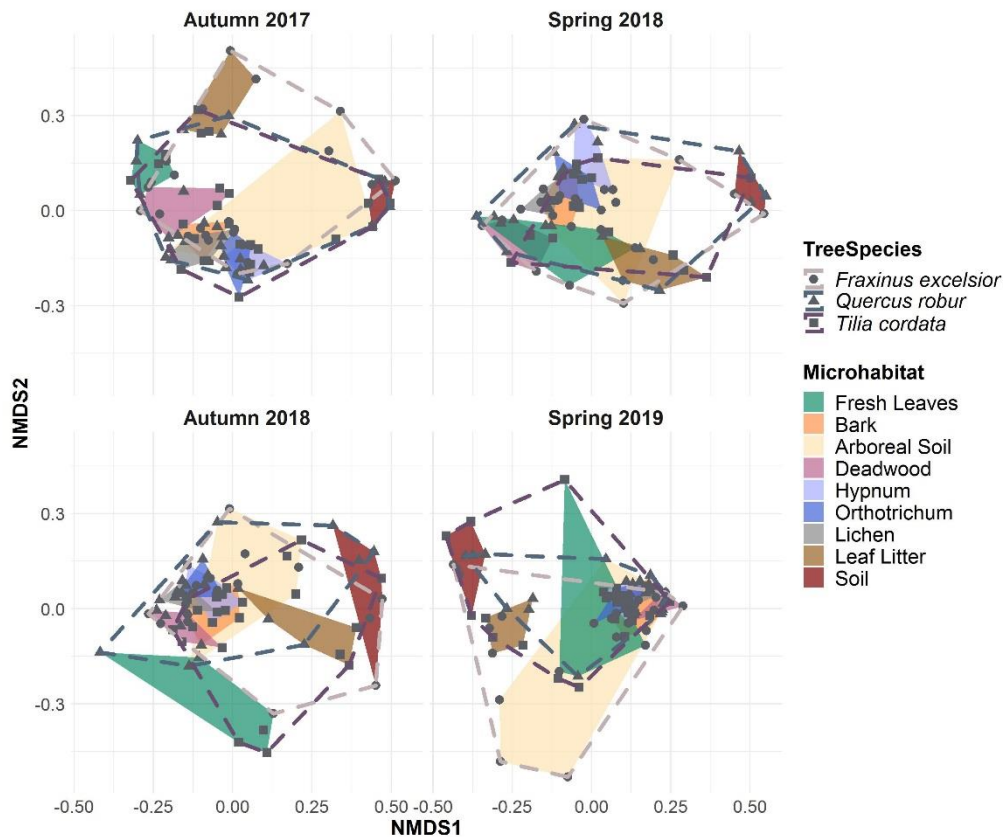

234 **Figure 3: Non-metric multidimensional scaling (NMDS) of Bray-Curtis dissimilarities of cercozoan and**  
235 **endomyxan communities between microhabitats and tree species of each sampling period.** Protistan  
236 communities showed a finer separation between canopy microhabitat communities during autumn, while leaf  
237 communities were more similar to other canopy microhabitat communities during spring (Stress values in  
238 Supplementary Table S9).

### 239 Differentiation of foliar communities

240 Despite high differences in beta diversity between communities of all sampled microhabitats per  
241 sampling period (Figure 3), almost 98% of OTUs were shared between all sampling periods  
242 (Supplementary Figure S5). Accordingly, differences in community composition were almost entirely  
243 based on temporal and spatial changes in the relative abundance of species. Thus, principal coordinate  
244 analysis of all four sampling periods showed a high overlap of communities when taking all  
245 microhabitats into account (Figure 4 A), the first and second axis explained 25% and 11% of the  
246 variance, respectively. A separate analysis of fresh leaf samples only showed highly distinct autumn and  
247 spring communities (Figure 4 B; perMANOVA:  $R^2$  0.15,  $p < 0.01$ ). Both axes explained 38% of variance  
248 and not only separated the spring communities from autumn communities, but also showed no overlap

249 between autumn communities of both years, suggesting a variable outcome after the recurrent  
250 community assembly over the seasons.

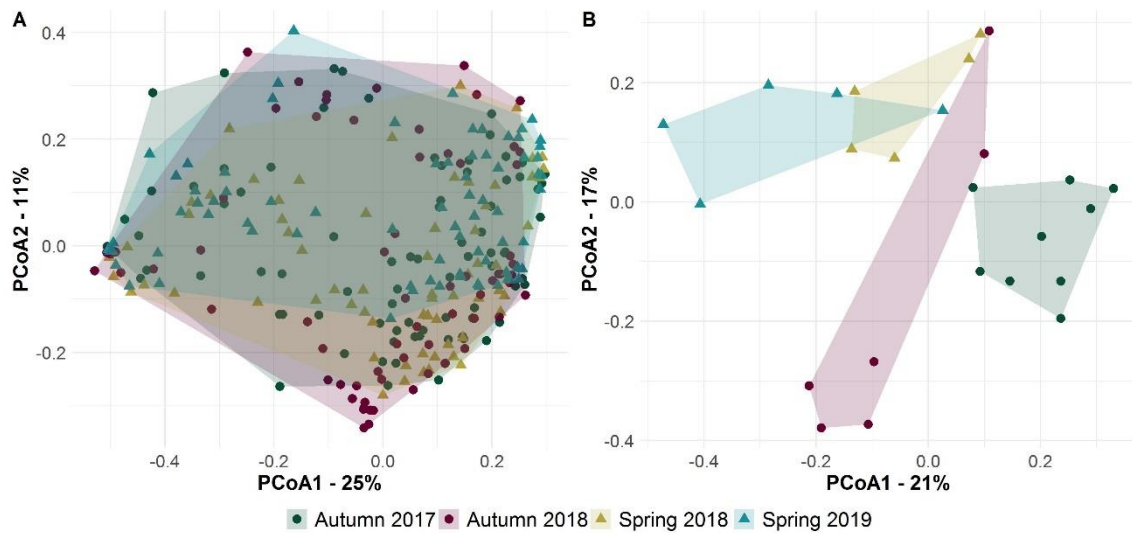

251 **Figure 4: Principal Coordinates Analysis (PCoA) of cercozoan and endomyxan communities of all four**  
252 **sampling periods.** Irrespective of the microhabitat identity, all sampling periods showed a comparable  
253 heterogeneity of detected communities (A). Cercozoan and endomyxan communities of fresh leaves were highly  
254 distinct between all four sampling periods, especially between the two seasons (B).

## 255 Functional diversity

256 More than three-quarters of the canopy cercozoan and endomyxan reads were bacterivores ( $77 \pm 9\%$ ),  
257 followed by omnivores ( $18 \pm 7\%$ ), sequences of unknown function ( $4 \pm 2\%$ ) and only very few  
258 eukaryvores ( $2 \pm 1\%$ ) (Figure 5). Communities of ground microhabitats showed a relative smaller  
259 proportion of bacterivores ( $55 \pm 11\%$ ; ANOVA:  $F = 31.09$ ,  $p < 0.001$ ) and more omnivores ( $26 \pm 7\%$ ;  
260 ANOVA:  $F = 8.14$ ,  $p < 0.01$ ), as well as a greater share of eukaryvores ( $5 \pm 2\%$ ; ANOVA:  $F = 49.87$ ,  $p$   
261  $< 0.001$ ) compared to the canopy microhabitats. Plant parasites and parasites of other host organisms  
262 were only marginally present, on average  $<1\%$ , except in autumn 2017, where soil communities  
263 contained 2.4% of reads derived from parasitic taxa. Most variation in protistan functional diversity was  
264 explained by differences between canopy and ground communities (perMANOVA:  $R^2 0.44$ ,  $p < 0.01$ )  
265 and by microhabitat identity (perMANOVA:  $R^2 0.29$ ,  $p < 0.01$ ). However, functional group composition  
266 did not differ between seasons (perMANOVA; canopy:  $R^2 0.03$ ,  $p = 0.37$ ; ground:  $R^2 0.23$ ,  $p = 0.24$ ).

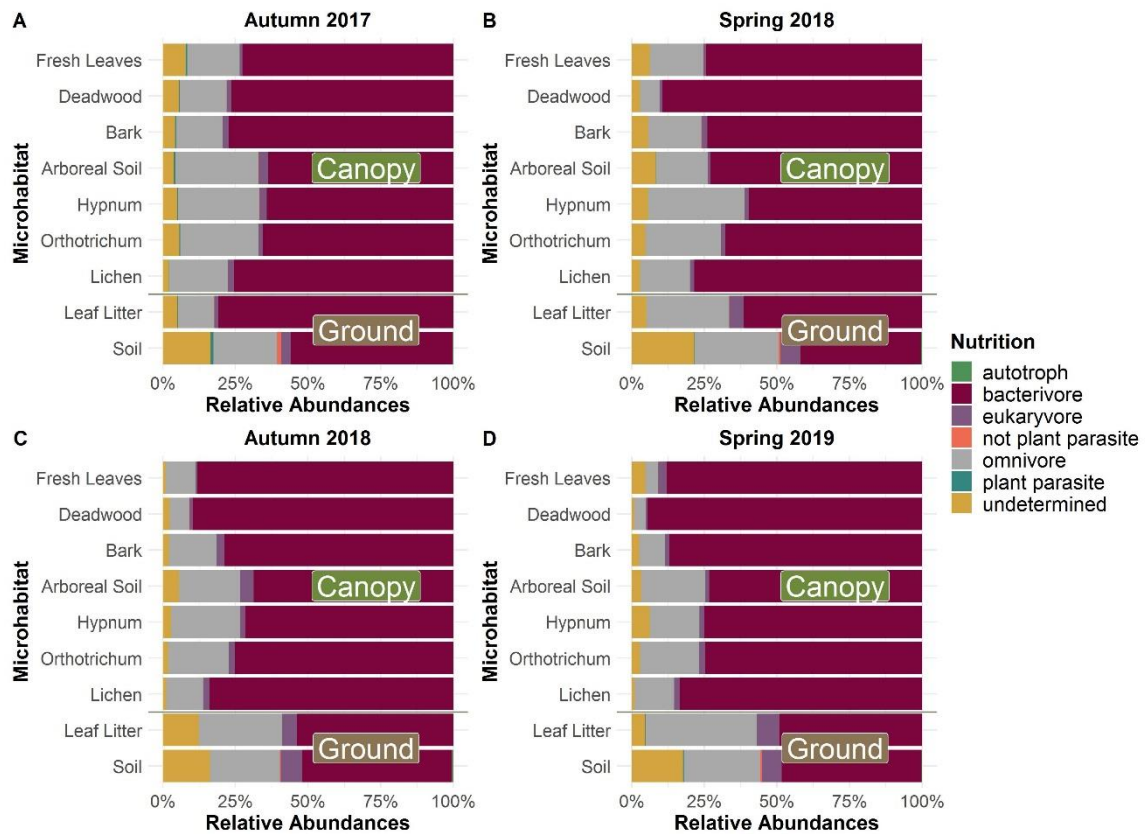

267 **Figure 5: Relative read abundances of functional groups per sampled microhabitat and sampling period.**  
268 Functional diversity of autumn (A,C) and spring samples (B,D) did not differ between seasons, but differences  
269 between sampled microhabitats and especially between the two strata (canopy and ground) were significant  
270 throughout all sampling periods. Bacterivores dominated, especially in tree canopies, whereas a higher proportion  
271 of omnivores and eukaryvores occurred on the ground.

## 272 DISCUSSION

273 This study aimed to identify seasonal changes in the patterns of community composition of the diverse  
274 protistan phyla Cercozoa and Endomyxa, over two consecutive years. A total number of 783 OTUs were  
275 detected in the Leipzig floodplain forest, which is 43% of the cercozoan OTU richness that Fiore-Donno  
276 et al. (2020) retrieved with the same method from mineral soil of 150 different forest sites across  
277 Germany. The high sequencing depth, due to the taxon-specific primers (Fiore-Donno *et al.* 2018),  
278 enabled a direct comparison of protistan communities dwelling different microhabitats within the forest  
279 canopies. We showed that in principle all detected OTUs could be found everywhere in the floodplain  
280 forest, a pattern which was already described by Jauss et al. (2020a). However, patterns of cercozoan  
281 and endomyxan beta diversity in tree canopies were strikingly divergent from communities detected on  
282 the ground, showing that distinct species dominated the different communities. This was in particular

283 true for the highly abundant glissomonad OTU001, with exceptionally higher relative abundance in  
284 canopies compared to the ground stratum. The clear differences between canopy and ground  
285 communities remained despite small, but significant seasonal changes.

#### 286 Seasonal variability of protists in tree canopies

287 Seasonality between spring and autumn explained 2% and 5% of the variation in beta diversity of canopy  
288 and ground communities, respectively (Figure 3, 4 B). About 10% of protistan OTUs were specifically  
289 associated with either spring or autumn season (Figure 2). For example, a *Rhogostoma* sp. (OTU394),  
290 belonging to omnivorous thecate amoebae in the Cryomonadida was temporally the most abundant  
291 taxon in autumn, while a bacterivorous *Bodomorpha* sp. from the order of Glissomonadida dominated  
292 in spring. Differences between spring and autumn communities were particularly evident on canopy  
293 leaves (Figure 4 B). In spring, beta diversity of the phyllosphere still showed some overlap with other  
294 canopy microhabitats (Figure 3). However, OTU richness showed very high variation and rarefaction  
295 curves of fresh canopy leaves did not reach a plateau (Supplementary Figure S1, S3), indicating high  
296 heterogeneity during community assembly shortly after leaf emergence in spring, while the distinct  
297 separation of beta diversity in autumn shows that specific leaf surface communities had established  
298 (Figure 3 B, 4 B). However, beta diversity of fresh leaves communities showed no overlap between both  
299 autumn samplings (Figure 4 B), indicating variable outcomes of community assembly driven by  
300 seasonal factors. October 2017 was an exceptionally warm and wet month, while October 2018 and the  
301 prior season was too warm and exceptionally dry (DWD; 2017, 2018). Nevertheless, autumn samples  
302 explained much more variation in beta diversity than spring samples (Supplementary Figure S4).  
303 Especially in 2017, ordination placed beta diversity of leaf litter communities on the ground between  
304 soil and foliar communities in the phyllosphere (Figure 3), suggesting that leaf litter still carries a  
305 signature of the preceding foliar community (Jauss *et al.* 2020a). Our environmental sequencing method,  
306 based on ribosomal DNA, did not allow to distinguish between active protists and their resting or  
307 dispersal stages, but instead must be considered as an integrative long-term measure of taxa that  
308 replicated well and formed resting stages in respective microhabitats. The clear differences in beta  
309 diversity between microhabitats indicate that well-adapted taxa accumulated and dominated over those

310 that arrived as resting stages by passive dispersal. This leads to differences in traits, which only can be  
311 inferred from related taxa (Dumack *et al.* 2020) as almost 80% of the OTUs showed a similarity of less  
312 than 97% to any sequence in the reference database, confirming the existence of a substantial  
313 undescribed taxonomic diversity within this dominant phylum of microbial eukaryotes in terrestrial  
314 ecosystems (Singer *et al.* 2021).

### 315 Protistan diversity and functional traits

316 The majority of the 783 OTUs could be assigned to the phylum Cercozoa (97%), the remaining to  
317 Endomyxa (3%) and to the incertae sedis Novel clade 10 (Tremulida <1%) (Supplementary Figure S6).  
318 With 753 OTUs cercozoan diversity was in line with previous studies, which established Sarcomonadea  
319 (Glissomonadida and Cercomonadida) as the dominant class in terrestrial habitats (Geisen *et al.* 2015;  
320 Ploch *et al.* 2016; Fiore-Donno *et al.* 2018). Especially the small and bacterivorous flagellates in the  
321 order Glissomonadida dominated throughout all canopy microhabitats during all four sampling periods  
322 (Figure 1, 5, Supplementary Figure S7). The Sarcomonadea were followed by mainly omnivorous testate  
323 amoebae in the orders Euglyphida and Cryomonadida. These omnivores can feed on both, bacteria and  
324 small eukaryotes, such as yeasts, algae and other protists (Dumack *et al.* 2020). While bacteria appeared  
325 as an essential food source in tree canopies, cercozoan communities of litter and mineral soil on the  
326 ground were characterized by a higher proportion of eukaryvores, which was mostly related to higher  
327 relative read numbers of vampyrellid amoebae that feed on a wide range of soil eukaryotes, including  
328 fungal mycelia and spores, algae, as well as nematodes (Anderson and Patrick 1980; Surek and  
329 Melkonian 1980; Hess, Sausen and Melkonian 2012). Our findings reflect the results of Fiore-Donno *et*  
330 *al.* (2020), who found a high proportion of vampyrellids, but almost no other Endomyxa in mineral soil  
331 samples of diverse forests in different regions in Germany. In addition, reads derived from taxa of so far  
332 undetermined feeding mode were enriched in litter and soil compared to canopy samples (Figure 5),  
333 indicating a more complex structure of microeukaryote food webs on the ground than in the physically  
334 harsh environment of the tree crown.

335 Most variation in cercozoan and endomyxan functional diversity was explained by microhabitat  
336 differences and the differences between canopy and ground communities, whereas seasonality with



337 respect to the investigated functional traits was not observed. However, seasonal differences could be  
338 revealed when taking taxonomically assigned relative read abundances into account (Supplementary  
339 Figure S7). One explanation for this pattern is that the abundance of less dominant orders was more  
340 variable between the sampled microhabitats and seasons. Because the functional traits (especially  
341 feeding traits) are still understudied, a measurable proportion of traits could not be assigned to the  
342 detected taxa (Canopy:  $4 \pm 2\%$ , Ground:  $12 \pm 6\%$ ).

#### 343 Forest canopies as a reservoir for potential plant pathogens

344 Spatial distribution of endomyxan plant parasites is patchy and increasing evidence hints to the habitat  
345 type as primary explanatory force. Khanipour Roshan et al. (2021) found them to be almost entirely  
346 missing in the surface of sandy dunes. Further, Fiore-Donno, Richter-Heitmann and Bonkowski (2020)  
347 reported an almost complete absence of endomyxan plant parasites in forest soils. We, however, found  
348 two temporally abundant OTUs among autumn communities which could be assigned to the root  
349 pathogenic species of *Polymyxa betae* and *Spongospora nasturtii* (Phytophyta: Plasmodiophorida)  
350 (Figure 2). Whereas, *S. nasturtii* is an obligate biotrophic root pathogen of watercress (*Nasturtium*  
351 *officinale*) (Down, Grenville and Clarkson 2002), a common herb of river banks in the floodplain forest.  
352 *P. betae* is an obligate root parasite in beet roots (Tamada and Asher 2016), and although its potential  
353 host range also includes Chenopodiaceae, Caryophyllaceae and Papaveraceae, (Barr and Asher 1992;  
354 Neuhauser et al. 2014), none of these host plants were detected in the sampled forest. The ubiquitous  
355 distribution of these two plasmodiophorids among protists of tree crowns, litter and soil in autumn  
356 samples (Supplementary Figure S2) reflects the complex life cycle of these plant pathogens with  
357 distribution via sporangia in autumn (Barr and Asher 1996). The high potential of wind dispersal of  
358 protistan propagules, was recently emphasized by Jauss et al. (2020b) and together with our results it  
359 appears that tree canopies play potential role as reservoirs for plant pathogenic microbial propagules. Or  
360 the other way around: tree canopies play a potential role as physical filters that may partly prevent the  
361 further spread of these plant pathogens.



## 362 Conclusion

363 Investigation into two important protistan lineages, Cercozoa and Endomyxa, over a period of two years  
364 revealed strong differences in community composition between canopy and soil microhabitats, and a  
365 small, but significant fraction of recurrent seasonal variability of these communities. We observed lower  
366 beta diversity between canopy communities in spring compared to autumn. Especially foliar  
367 communities changed during the aging of leaves from spring to autumn, indicating an interannual  
368 community assembly. One particular glissomonadid OTU appeared to be a canopy specialist, while high  
369 read numbers of root parasitic phytomyxean OTUs in tree canopies during autumn demonstrate a  
370 potential role of the canopy surface as an important reservoir for wind-dispersed propagules of microbial  
371 eukaryotes. Occasionally leaf litter communities showed more similarity to foliar canopy communities  
372 than to those of the soil directly underneath. Thus, after litter fall, the preceding seasonal community  
373 assembly in the canopy contributes to spatial differences of protistan communities on the ground, but  
374 the latter become enriched in omnivores and eukaryvores relative to the predominantly bacterivorous  
375 canopy inhabitants. The described diversity of Cercozoa and Endomyxa in this study is just one striking  
376 example of dozens of microbial eukaryote phyla whose canopy inhabitants still await discovery.

## 377 Conflict of Interest

378 None declared.

## 379 Funding

380 This work was supported by the Priority Program SPP 1991: Taxon-omics – New Approaches for  
381 Discovering and Naming Biodiversity of the German Research Foundation (DFG) with funding to MB  
382 [1907/19-1] and MS [Schl 229/20-1].

## 383 Acknowledgements

384 The authors would like to thank Rolf Engelmann for his assistance with the field work by operating the  
385 canopy crane, as well as the Leipzig Canopy Crane Platform of the German Centre for Integrative

386 Biodiversity Research (iDiv) for providing the site access and allowing us to sample the trees from their  
387 field trial.

## 388 References

- 389 Agler MT, Ruhe J, Kroll S *et al.* Microbial Hub Taxa Link Host and Abiotic Factors to Plant Microbiome  
390 Variation. *PLoS Biol* 2016, DOI: 10.1371/journal.pbio.1002352.
- 391 Aguilera A, Zettler E, Gómez F *et al.* Distribution and seasonal variability in the benthic eukaryotic  
392 community of Río Tinto (SW, Spain), an acidic, high metal extreme environment. *Syst Appl*  
393 *Microbiol* 2007, DOI: 10.1016/j.syapm.2007.05.003.
- 394 Amacker N, Gao Z, Agaras BC *et al.* Biocontrol Traits Correlate With Resistance to Predation by  
395 Protists in Soil Pseudomonads. *Frontiers in Microbiology* 2020, DOI:  
396 10.3389/fmicb.2020.614194.
- 397 Anderson TR, Patrick ZA. Soil Vampyrellid amoebae that cause small perforations in conidia of  
398 *Cochliobolus sativus*. *Soil Biol Biochem* 1980, DOI: 10.1016/0038-0717(80)90053-X.
- 399 Araújo M, Godinho M. Spatial and seasonal variations of planktonic protists ( Mastigophora , Sarcodina  
400 and Ciliophora ) in a river-lacustrine system in northeast Brazil. *Limnology* 2008;20:235–44.
- 401 Baldocchi D, Collineau S. The Physical Nature of Solar Radiation in Heterogeneous Canopies: Spatial  
402 and Temporal Attributes. In: *Exploitation of Environmental Heterogeneity by Plants*. San Diego:  
403 Academic Press, 1994, 21–71.
- 404 Bamforth SS. Population dynamics of soil and vegetation protozoa. *Integr Comp Biol* 1973, DOI:  
405 10.1093/icb/13.1.171.
- 406 Bamforth SS. Protozoa from aboveground and ground soils of a tropical rain forest in Puerto Rico.  
407 *Pedobiologia* 2007, DOI: 10.1016/j.pedobi.2006.10.009.
- 408 Bamforth SS. Distribution of and insights from soil protozoa of the Olympic coniferous rain forest.  
409 *Pedobiologia* 2010, DOI: 10.1016/j.pedobi.2010.05.001.
- 410 Barr KJ, Asher MJC. The host range of *Polymyxa betae* in Britain. *Plant Pathol* 1992, DOI:  
411 10.1111/j.1365-3059.1992.tb02317.x.
- 412 Barr KJ, Asher MJC. Studies on the life-cycle of *Polymyxa betae* in sugar beet roots. *Mycol Res* 1996,  
413 10.1016/S0953-7562(96)80123-7.
- 414 Bass D, Ward GM, Burki F. Ascetosporea. *Curr Biol* 2019, DOI: 10.1016/j.cub.2018.11.025.
- 415 Bolyen E, Rideout JR, Dillon MR *et al.* Reproducible, interactive, scalable and extensible microbiome  
416 data science using QIIME 2. *Nat Biotechnol* 2019, DOI: 10.1038/s41587-019-0209-9.
- 417 Camacho C, Coulouris G, Avagyan V *et al.* BLAST+: Architecture and applications. *BMC*  
418 *Bioinformatics* 2009, DOI: 10.1186/1471-2105-10-421.
- 419 Copeland JK, Yuan L, Layeghifard M *et al.* Seasonal community succession of the phyllosphere  
420 microbiome. *Mol Plant-Microbe Interact* 2015, DOI: 10.1094/MPMI-10-14-0331-FI.
- 421 Degrun F, Dumack K, Fiore-Donno AM *et al.* Distinct communities of Cercozoa at different soil depths  
422 in a temperate agricultural field. *FEMS Microbiol Ecol* 2019, DOI: 10.1093/femsec/fiz041.
- 423 Down GJ, Grenville LJ, Clarkson JM. Phylogenetic analysis of Spongospora and implications for the  
424 taxonomic status of the plasmodiophorids. *Mycol Res* 2002, DOI: 10.1017/S0953756202006391.
- 425 Dumack K, Fiore-Donno AM, Bass D *et al.* Making sense of environmental sequencing data:  
426 Ecologically important functional traits of the protistan groups Cercozoa and Endomyxa  
427 (Rhizaria). *Mol Ecol Resour* 2020, DOI: 10.1111/1755-0998.13112.
- 428 DWD. Deutscher Wetterdienst. Available at: [dwd.de/EN/](http://dwd.de/EN/) (12 December 2020, date last accessed).
- 429 Edgar RC, Haas BJ, Clemente JC *et al.* UCHIME improves sensitivity and speed of chimera detection.  
430 *Bioinformatics* 2011, DOI: 10.1093/bioinformatics/btr381.
- 431 Finlay BJ. Global dispersal of free-living microbial eukaryote species. *Science* 2002, DOI:  
432 10.1126/science.1070710.
- 433 Fiore-Donno AM, Richter-Heitmann T, Bonkowski M. Contrasting Responses of Protistan Plant  
434 Parasites and Phagotrophs to Ecosystems, Land Management and Soil Properties. *Front Microbiol*  
435 2020, DOI: 10.3389/fmicb.2020.01823.
- 436 Fiore-Donno AM, Richter-Heitmann T, Degrun F *et al.* Functional traits and spatio-temporal structure

- 437 of a major group of soil protists (rhizaria: Cercozoa) in a temperate grassland. *Front Microbiol*  
438 2019, DOI: 10.3389/fmicb.2019.01332.
- 439 Fiore-Donno AM, Rixen C, Rippin M *et al.* New barcoded primers for efficient retrieval of cercozoan  
440 sequences in high-throughput environmental diversity surveys, with emphasis on worldwide  
441 biological soil crusts. *Mol Ecol Resour* 2018, DOI: 10.1111/1755-0998.12729.
- 442 Flues S, Bass D, Bonkowski M. Grazing of leaf-associated Cercomonads (Protists: Rhizaria: Cercozoa)  
443 structures bacterial community composition and function. *Environ Microbiol* 2017, DOI:  
444 10.1111/1462-2920.13824.
- 445 Foissner W. Soil protozoa: Fundamental problems ecological significance, adaptations in ciliates and  
446 testaceans, bioindicators, and guide to the literature. *Prog Protistol* 1987;2:69–212.
- 447 Foissner W. Biogeography and dispersal of micro-organisms: A review emphasizing protists. *Acta*  
448 *Protozool* 2006;45:111–36.
- 449 Fournier B, Samaritani E, Frey B *et al.* Higher spatial than seasonal variation in floodplain soil  
450 eukaryotic microbial communities. *Soil Biol Biochem* 2020, DOI: 10.1016/j.soilbio.2020.107842.
- 451 Gehlenborg N. UpSetR: A more scalable alternative to venn and euler diagrams for visualizing  
452 intersecting sets. 2019. Available at: [cran.r-project.org/package=UpSetR](http://cran.r-project.org/package=UpSetR) (12 December 2020, date  
453 last accessed).
- 454 Geisen S, Tveit AT, Clark IM *et al.* Metatranscriptomic census of active protists in soils. *ISME J* 2015,  
455 DOI: 10.1038/ismej.2015.30.
- 456 Guillou L, Bachar D, Audic S *et al.* The Protist Ribosomal Reference database (PR2): A catalog of  
457 unicellular eukaryote Small Sub-Unit rRNA sequences with curated taxonomy. *Nucleic Acids Res*  
458 2013, DOI: 10.1093/nar/gks1160.
- 459 Hess S, Sausen N, Melkonian M. Shedding light on vampires: The phylogeny of vampyrellid amoebae  
460 revisited. *PLoS One* 2012, DOI: 10.1371/journal.pone.0031165.
- 461 Hsieh T, Ma K, Chao A. iNEXT: Interpolation and extrapolation for species diversity. Available at:  
462 <http://chao.stat.nthu.edu.tw/blog/software-download> (12 December 2020, date last accessed).
- 463 Jacques MA, Kinkel LL, Morris CE. Population sizes, immigration, and growth of epiphytic bacteria on  
464 leaves of different ages and positions of field-grown endive (*Cichorium endivia* var. *latifolia*). *Appl*  
465 *Environ Microbiol* 1995, DOI: 10.1128/aem.61.3.899-906.1995.
- 466 Jauss R-T, Walden S, Fiore-Donno AM *et al.* From Forest Soil to the Canopy: Increased Habitat  
467 Diversity Does Not Increase Species Richness of Cercozoa and Oomycota in Tree Canopies. *Front*  
468 *Microbiol* 2020a, DOI: 10.3389/fmicb.2020.592189.
- 469 Jauss R-T, Nowack A, Walden S *et al.* To the canopy and beyond: Air samples reveal wind dispersal as  
470 a driver of ubiquitous protistan pathogen assembly in tree canopies. *bioRxiv.org* 2020b, DOI:  
471 10.1101/2020.11.30.405688.
- 472 Jousset A. Ecological and evolutive implications of bacterial defences against predators. *Environ*  
473 *Microbiol* 2012, DOI: 10.1111/j.1462-2920.2011.02627.x.
- 474 Khanipour Roshan S, Dumack K, Bonkowski B *et al.* (2021). Taxonomic and Functional Diversity of  
475 Heterotrophic Protists (Cercozoa and Endomyxa) from Biological Soil Crusts. *Microorganisms*  
476 2021, DOI: 10.3390/microorganisms9020205.
- 477 Krome K, Rosenberg K, Dickler, C *et al.* Soil bacteria and protozoa affect root branching via effects on  
478 the auxin and cytokinin balance in plants. *Plant and Soil* 2010, DOI: 10.1007/s11104-009-0101-  
479 3.
- 480 Lauber CL, Ramirez KS, Aanderud Z *et al.* Temporal variability in soil microbial communities across  
481 land-use types. *ISME J* 2013, DOI: 10.1038/ismej.2013.50.
- 482 Lex A, Gehlenborg N, Strobel H *et al.* UpSet: Visualization of intersecting sets. *IEEE Trans Vis Comput*  
483 *Graph* 2014, DOI: 10.1109/TVCG.2014.2346248.
- 484 Lindow SE, Brandl MT. Microbiology of the Phyllosphere. *Appl Environ Microbiol* 2003, DOI:  
485 10.1128/AEM.69.4.1875.
- 486 Love MI, Huber W, Anders S. Moderated estimation of fold change and dispersion for RNA-seq data  
487 with DESeq2. *Genome Biol* 2014, DOI: 10.1186/s13059-014-0550-8.
- 488 Manching HC, Balint-Kurti PJ, Stapleton AE. Southern leaf blight disease severity is correlated with  
489 decreased maize leaf epiphytic bacterial species richness and the phyllosphere bacterial diversity  
490 decline is enhanced by nitrogen fertilization. *Front Plant Sci* 2014, DOI: 10.3389/fpls.2014.00403.
- 491 Matz C, Kjelleberg S. Off the hook - How bacteria survive protozoan grazing. *Trends Microbiol* 2005,  
492 DOI: 10.1016/j.tim.2005.05.009.

- 493 Morris CE, Kinkel L. Fifty years of phyllosphere microbiology: Significant contributions to research in  
494 related fields. In: *Phyllosphere Microbiology*. St. Paul: APS Press, 2002, 353–363.
- 495 Mueller JA, Mueller WP. Colpoda cucullus: A Terrestrial Aquatic. *Am Midl Nat* 1970;84:1.
- 496 Mwajita MR, Murage H, Tani A *et al.* Evaluation of rhizosphere, rhizoplane and phyllosphere bacteria  
497 and fungi isolated from rice in Kenya for plant growth promoters. *Springerplus* 2013, DOI:  
498 10.2307/2423721.
- 499 Neuhauser S, Kirchmair M, Bulman S *et al.* Cross-kingdom host shifts of phytomyxid parasites. *BMC*  
500 *Evol Biol* 2014, DOI: 10.1186/1471-2148-14-33.
- 501 Oksanen J, Blanchet FG, Kindt R *et al.* vegan: Community ecology package. 2019. Available at: cran.r-  
502 project.org/package=vegan (12 December 2020, date last accessed).
- 503 Parker GG, Lowman MD, Nadkarni NM. Structure and Microclimate of Forest Canopies. In: *Forest*  
504 *Canopies*. 1995, 73–106.
- 505 Peñuelas J, Terradas J. The foliar microbiome. *Trends Plant Sci* 2014, DOI: 10.1111/j.1438-  
506 8677.2011.00532.x.
- 507 Perrigo AL, Romeralo M, Baldauf SL. What’s on your boots: an investigation into the role we play in  
508 protist dispersal. *J Biogeogr* 2012, DOI: 10.1111/j.1365-2699.2012.02691.x.
- 509 Ploch S, Rose LE, Bass D *et al.* High Diversity Revealed in Leaf-Associated Protists (Rhizaria:  
510 Cercozoa) of Brassicaceae. *J Eukaryot Microbiol* 2016, DOI: 10.1111/jeu.12314.
- 511 R Core Team. R: A language and environment for statistical computing. Vienna, Austria 2019 .  
512 Available at: [www.r-project.org/](http://www.r-project.org/) (12 December 2020, date last accessed).
- 513 Rastogi G, Coaker GL, Leveau JHJ. New insights into the structure and function of phyllosphere  
514 microbiota through high-throughput molecular approaches. *FEMS Microbiol Lett* 2013, DOI:  
515 10.1111/1574-6968.12225.
- 516 Rastogi G, Sbodio A, Tech JJ *et al.* Leaf microbiota in an agroecosystem: Spatiotemporal variation in  
517 bacterial community composition on field-grown lettuce. *ISME J* 2012, DOI:  
518 10.1038/ismej.2012.32.
- 519 Reville DL, Stewart KW, Schlichting HE. Passive Dispersal of Viable Algae and Protozoa By Certain  
520 Craneflies and Midges. *Ecology* 1967, DOI: 10.2307/1934558.
- 521 Rognes T, Flouri T, Nichols B *et al.* VSEARCH: A versatile open source tool for metagenomics. *PeerJ*  
522 2016, DOI: 10.7717/peerj.2584.
- 523 Rynearson TA, Newton JA, Armbrust E V. Spring bloom development, genetic variation, and  
524 population succession in the planktonic diatom *Ditylum brightwellii*. *Limnol Oceanogr* 2006, DOI:  
525 10.4319/lo.2006.51.3.1249.
- 526 Schlichting HE, Sides SL. The Passive Transport of Aquatic Microorganisms by Selected Hemiptera. *J*  
527 *Ecol* 1969, DOI: 10.2307/2258497.
- 528 Schloss PD, Westcott SL, Ryabin T *et al.* Introducing mothur: Open-source, platform-independent,  
529 community-supported software for describing and comparing microbial communities. *Appl*  
530 *Environ Microbiol* 2009, DOI: 0.1128/AEM.01541-09.
- 531 Singer D, Seppely CVW, Lentendu G *et al.* Protist taxonomic and functional diversity in soil, freshwater  
532 and marine ecosystems. *Environ Int* 2021, DOI: 10.1016/j.envint.2020.106262.
- 533 Stone BWG, Weingarten EA, Jackson CR. The Role of the Phyllosphere Microbiome in Plant Health  
534 and Function. *Annu Plant Rev online* 2018, DOI: 10.1002/9781119312994.apr0614.
- 535 Surek B, Melkonian M. The Filose Amoeba *Vampyrellidium perforans* nov. sp. (Vampyrellidae,  
536 Aconchulinida): Axenic Culture, Feeding Behaviour and Host Range Specificity. *Arch fur*  
537 *Protistenkd* 1980, DOI: 10.1016/S0003-9365(80)80003-0.
- 538 Tamada T, Asher MJC. The plasmodiophorid protist *Polymyxa betae*. In: *Rhizomania*. Switzerland:  
539 Springer International Publishing. 2016, 135–53.
- 540 Tamigneaux E, Mingelbier M, Klein B *et al.* Grazing by protists and seasonal changes in the size  
541 structure of protozooplankton and phytoplankton in a temperate nearshore environment (western  
542 Gulf of St. Lawrence, Canada). *Mar Ecol Prog Ser* 1997, DOI: 10.3354/meps146231.
- 543 Thompson IP, Bailey MJ, Fenlon JS *et al.* Quantitative and qualitative seasonal changes in the microbial  
544 community from the phyllosphere of sugar beet (*Beta vulgaris*). *Plant Soil* 1993, DOI:  
545 10.1007/BF00013015.
- 546 Verni F, Rosati G. Resting cysts: A survival strategy in Protozoa Ciliophora. *Ital J Zool* 2011, DOI:  
547 10.1080/11250003.2011.560579.
- 548 Vorholt JA. Microbial life in the phyllosphere. *Nat Rev Microbiol* 2012, DOI: 10.1038/nrmicro2910.

549 Wickham H. ggplot2: Elegant graphics for data analysis. Springer-Verlag New York 2016. Available  
550 at: [ggplot2.tidyverse.org](http://ggplot2.tidyverse.org) (12 December 2020, date last accessed).  
551 Wilkinson DM. What is the upper size limit for cosmopolitan distribution in free-living  
552 microorganisms? *J Biogeogr* 2001, DOI: 10.1046/j.1365-2699.2001.00518.x.

553

## 554 Data Accessibility

555 Raw sequence data have been submitted to the European Nucleotide Archive (ENA) database under the  
556 Bioproject number PRJEB37525, with run accession numbers ERR3994029, ERR4913261 and  
557 ERR4911998.

## 558 Author contributions

559 MB and MS designed the study. SW, R-TJ, SS, RW and KF conceived and conducted the sampling and  
560 DNA extraction. AMF-D contributed the primers. KD helped in laboratory work. SW and KF conducted  
561 the PCRs. R-TJ assisted in bioinformatics, provided the original R script to detect temporally abundant  
562 OTUs. SW performed the bioinformatic and statistical analyses and drafted the manuscript. All authors  
563 contributed to and approved the final version.
